# Supplementary material
Source: Elsevier journal article supplement (https://www.sciencedirect.com/science/article/pii/S2254887419300049)
Supplement: mmc1 [file S2254887419300049:mmc1.docx]

**Anexo 1. Grupo de inmunoquímica de la Sociedad Española de Inmunología**

Carmen Cámara Hijón. Sección de Inmunología. Laboratorio de Análisis Clínicos. Hospital San Pedro de Alcántara. Cáceres. Javier Carbone Campoverde. Servicio de Inmunología Clínica. Hospital General Universitario Gregorio Marañón. Madrid.

Joana Ferrer Balaguer. Servicio de Inmunología. Hospital Universitario Son Espases. Palma de Mallorca. Juana Jiménez Jiménez. Servicio de Análisis Clínicos. Hospital Universitario Severo Ochoa. Madrid. Cándido Juárez Rubio. Servicio de Inmunología. Hospital de la Santa Creu i Sant Pau. Barcelona. Marcos López Hoyos. Servicio de Inmunología. Hospital Universitario Marqués de Valdecilla. Santander.

Eva M. Martínez Cáceres. Servicio de Inmunología. Hospital Universitario Germans Trias i Pujol. Barcelona. Virginia Mas Bosch. Servicio de Inmunología. Hospital Universitario de Bellvitge. Barcelona. Joaquín Navarro Caspistegui. Servicio de Inmunología. Hospital General Universitario Gregorio Marañón. Madrid.

Esther Ocaña Pérez. Servicio de Análisis Clínicos. Complejo Hospitalario de Jaén. Jaén.

Francisco Pujalte Mora. Servicio de Inmunología. Catlab. Barcelona. Juan José Rodríguez Molina. Servicio de Inmunología. Hospital General Universitario Gregorio Marañón. Madrid. Aina Teniente Serra. Servicio de Inmunología. Hospital Universitario Germans Trias i Pujol. Barcelona. Jordi Yagüe Ribes. Servicio de Inmunología. Hospital Clìnic. Barcelona.
